# Supplementary material for: Investigating chemoresistance to improve sensitivity of childhood T-cell acute lymphoblastic leukemia to parthenolide
Source: PubMed Central journal article supplement — Haematologica. 2018 May 17;103(9):1493–501. doi: 10.3324/haematol.2017.186700 (PMC6119138; doi:10.3324/haematol.2017.186700), 2018-09
Supplement: 2017_186700-Disclosures_and_Contributions.pdf [file 2017_186700-Disclosures_and_Contributions.pdf]

Haematologica  
HAEMATOL/2017/186700  
Version 3

Investigating chemoresistance to improve sensitivity of childhood T cell acute lymphoblastic leukemia to parthenolide

Benjamin C. Ede, Rafal R. Asmaro, John P. Moppett, Paraskevi Diamanti, and Allison Blair

Disclosures: The authors have no conflicts of interest to declare

Contributions: B.C.E. processed samples, designed and performed experiments, analyzed data and wrote the report. R.R.A. performed experiments. J.P.M. facilitated sample collection, collated the clinical data information and commented on the report. P.D. processed samples, facilitated clinical data collection and commented on the report. A.B. supervised the study, analyzed data and wrote the report.
